# Supplementary material for: All-solid-state MoS2/Li6PS5Br/In–Li batteries as a novel type of Li/S battery
Source: Royal Society of Chemistry journal article supplement (doi:10.1039/c5ta02372f), 2015-01-01
Supplement: c5ta02372f1.pdf [file c5ta02372f1.pdf]

## Experimental Section

To prepare the  $\text{Li}_6\text{PS}_5\text{Br}$  solid electrolyte, stoichiometric mixtures of  $\text{Li}_2\text{S}$  (Alfa Aesar, 99.9%),  $\text{P}_2\text{S}_5$  (Loba Chemie, 98%) and  $\text{LiBr}$  (Sigma-Aldrich, 99.9%) were mechanically milled using high-energy planetary ball mill (Fritsch Pulverisette 7) at a rotating speed of 500 rpm for 20h. The amorphous ball-milled precursor was then pelletized and annealed at  $300^\circ\text{C}$  for 5h, leading to crystalline argyrodite-type  $\text{Li}_6\text{PS}_5\text{Br}$ . For the composite cathode powder, commercial  $\text{MoS}_2$  (Sigma-Aldrich, 99%),  $\text{Li}_6\text{PS}_5\text{Br}$ , and super P carbon were mixed in a weight ratio of 40: 56: 4 and ball milled at 500 rpm for 30 min. All-solid-state  $\text{MoS}_2/\text{Li}_6\text{PS}_5\text{Br}/\text{In-Li}$  cell was assembled as follows. 100 mg of  $\text{Li}_6\text{PS}_5\text{Br}$  solid electrolyte powder, together with 15 mg of the composite cathode powder, were put into a 13 mm die sequentially, and pelletized at a pressure of  $6000\text{ kg/cm}^2$ . A foil of indium-lithium alloy as anode was attached to the electrolyte side of the pellet. Thereafter, the stack was mounted and sealed in a Swagelok-type cell. For comparison,  $\text{MoS}_2$  cell using liquid electrolyte was also prepared. The same commercial  $\text{MoS}_2$  was mixed with super P carbon and poly(vinylidene fluoride) (PVDF) in a weight ratio of 70:15:15 and dissolved in N-methylpyrrolidone (NMP). The obtained slurry was then pasted onto Cu current collector. Coin cell was assembled with Li foil as counter electrode, 1 M  $\text{LiPF}_6$  in 1:1 EC/DEC as electrolyte and glass fiber (Whatman) as separator. The complete process was performed in a glove box under argon atmosphere.

The morphologies of the pristine  $\text{MoS}_2$  powder and the composite cathode powder was investigated by Scanning Electron Microscopy (SEM, Zeiss Supra 40 VP). To understand the electrode reaction of the all-solid-state  $\text{MoS}_2$  batteries, cyclic voltammetry (CV) was performed at a scanning rate of  $0.02\text{ mV/s}$  between  $0.1\text{ V}$  and  $3.0\text{ V}$  (vs  $\text{Li}/\text{Li}^+$ ) using a potentiostat/galvonostat (Arbin BT2000). Existence of Mo metal nanoparticles in  $\text{MoS}_2$  cathodes after cycling was confirmed using Transmission Electron Microscopy (TEM, JEOL 2010F). The  $\text{MoS}_2$  composite cathode powder at charged state was placed into deionized water (DI water) and sonicated for 1 min. By this treatment, the water-soluble lithium compounds in the composite cathode powder, such as solid electrolyte  $\text{Li}_6\text{PS}_5\text{Br}$  and  $\text{Li}_2\text{S}$ , will be dissolved, leaving behind the components insoluble in water (e.g. Mo, S, C,  $\text{MoS}_2$ , if they exist). The resulting solution was centrifuged and the insoluble black residue was used for TEM measurement. Room temperature electrochemical tests were conducted at a C rate of C/10 (i.e. a current density of  $67\text{ mA per gram of MoS}_2$ ). The voltage range was restricted to  $0.1 - 3.0\text{ V}$  in the first 5 cycles and  $1.0\text{ V} - 3.0\text{ V}$  in the subsequent cycles. High temperature rate performance was studied at  $70^\circ\text{C}$  up to 700 cycles. The charge/discharge current changed every 200 cycles from C/5, C/2 to 1C, and then back to C/5 for the last 100 cycles. In this case the voltage range was set to  $0.1 - 3.1\text{ V}$  (vs.  $\text{Li}/\text{Li}^+$ ) in the first cycle and  $0.6 - 3.1\text{ V}$  (vs.  $\text{Li}/\text{Li}^+$ ) in the following cycles. The cell using liquid electrolyte was tested at C/5 with the same voltage range up to 100 cycles. All voltages discussed in this manuscript are to be understood with respect to  $\text{Li}/\text{Li}^+$ , unless pointed out specially. The potential of indium vs.  $\text{Li}/\text{Li}^+$  is  $0.6\text{ V}$ .
